# Supplementary material
Source: publisher site journal article supplement (https://www.dovepress.com/article/210486)
Supplement: Supplementary file 1 [file get_supplementary_file.php]

## Supporting Information

A genipin-crosslinked protein-polymer hybrid system for the  
intracellular delivery of ribonuclease A

Xiao Liang, Xiuhui Tang, Jiebing Yang, Jiayuan Zhang, Haobo Han,\* Quanshun Li\*

*Key Laboratory for Molecular Enzymology and Engineering of Ministry of Education,*

*School of Life Sciences, Jilin University, Changchun 130012, China*

\*Corresponding author.

Tel.: +86-431-85155201; Fax: +86-431-85155200.

E-mail: [quanshun@jlu.edu.cn](mailto:quanshun@jlu.edu.cn) (Q. Li); [hanhb1310@mails.jlu.edu.cn](mailto:hanhb1310@mails.jlu.edu.cn) (H. Han).

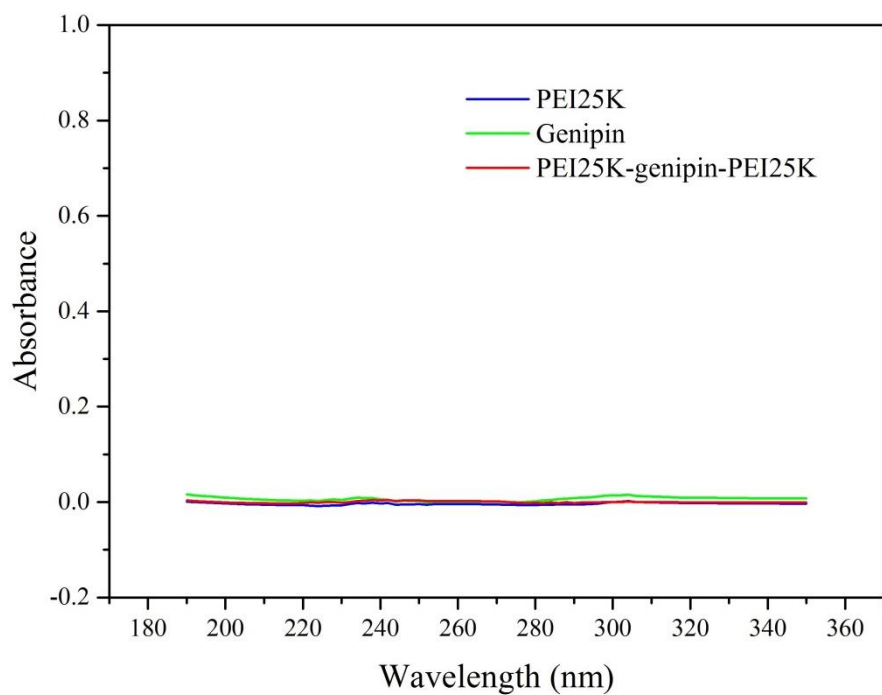

**Figure S1.** UV-Vis spectra of PEI25K, genipin and the product from genipin-mediated crosslinking of PEI25K.

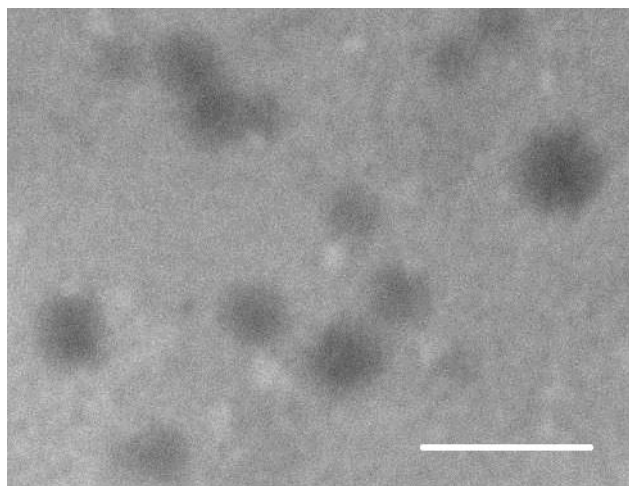

**Figure S2.** TEM image of RGP nanoparticles. The scale bar is 500 nm.

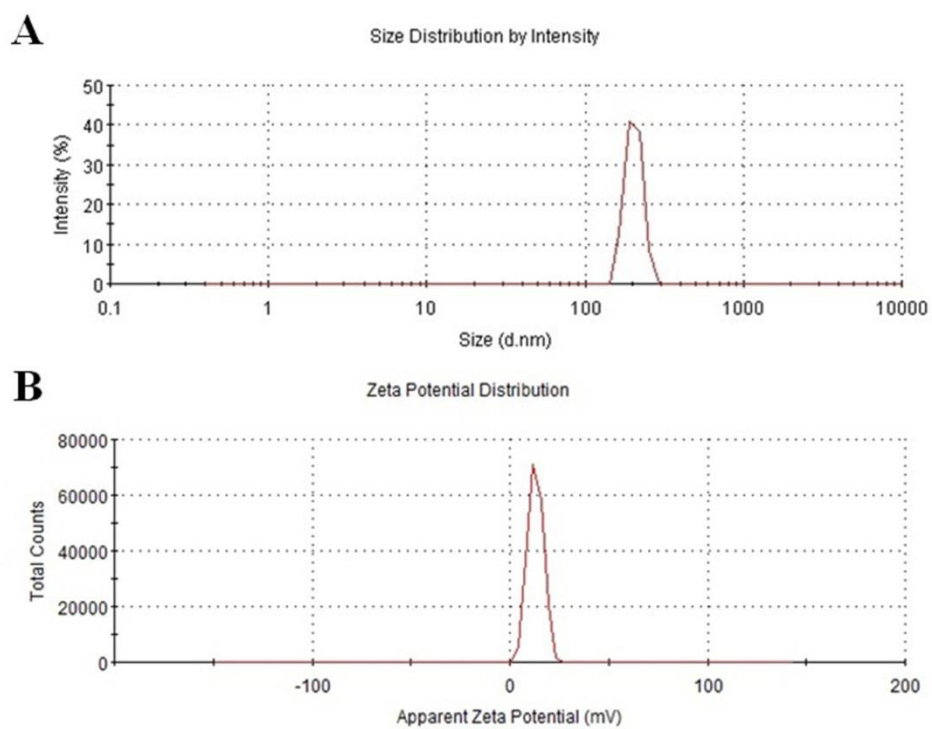

**Figure S3.** Hydrodynamic diameter (A) and zeta potential (B) curves of RGP nanoparticles.

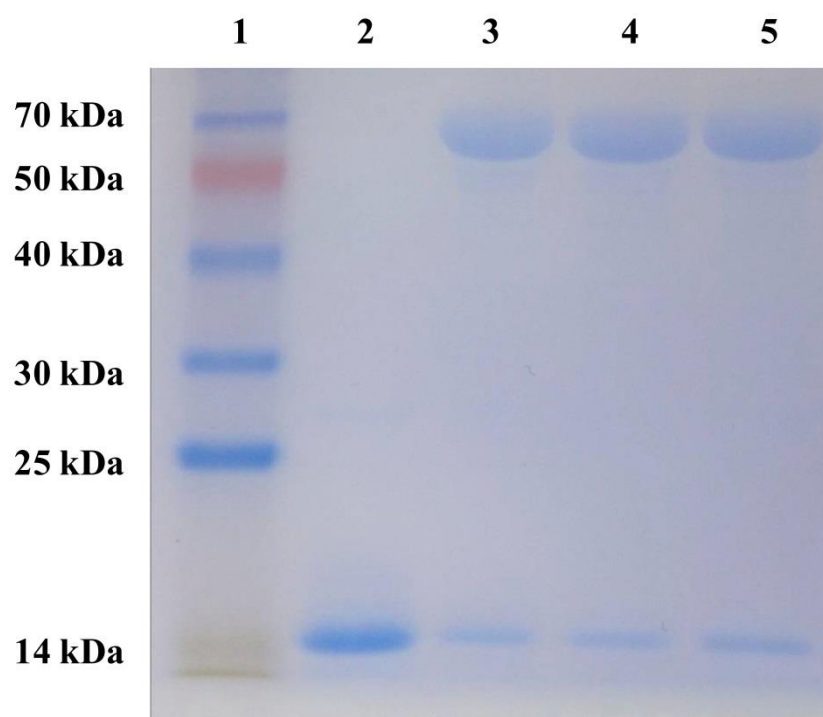

**Figure S4.** SDS-PAGE analysis of RGP nanoparticles of different batches. Lane 1: marker; lane 2: free RNase A; and lane 3-5: RGP nanoparticles of different batches.

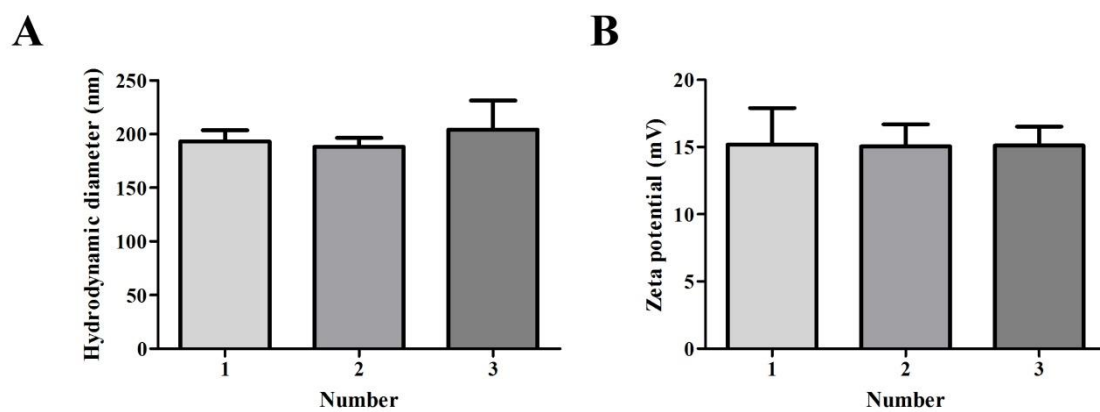

**Figure S5.** Hydrodynamic diameter (A) and zeta potential (B) of RGP nanoparticles of different batches.

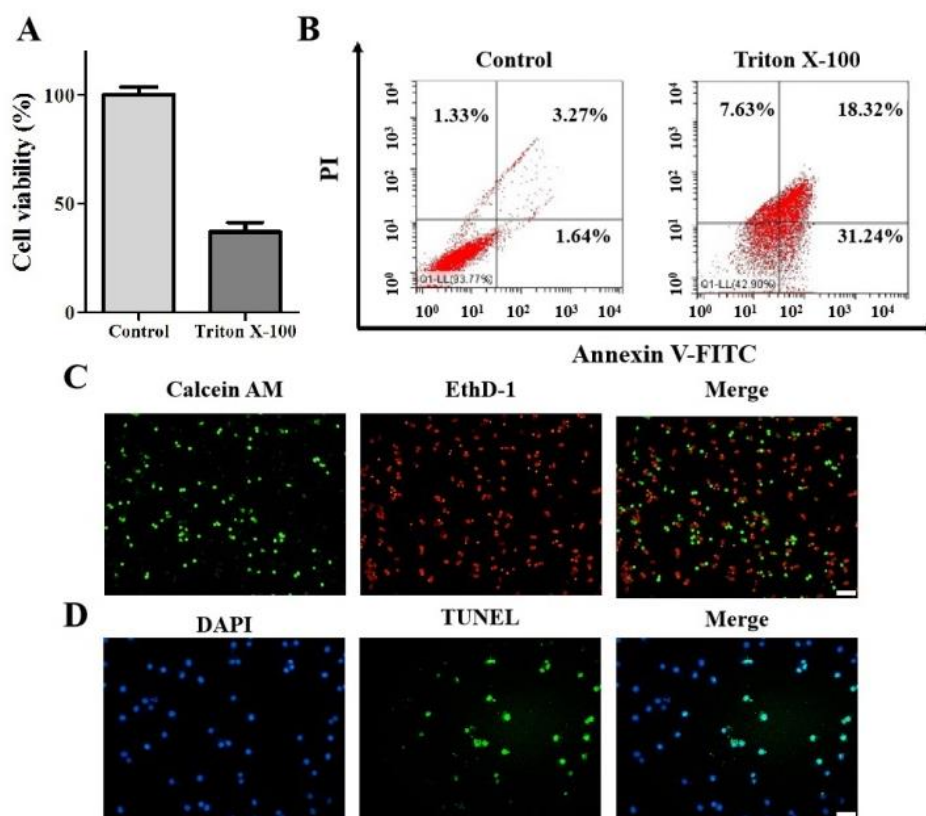

**Figure S6.** MTT assay (A), cell apoptosis (B), Live/Dead staining (C) and TUNEL staining (D) of HeLa cells after the treatment with 0.1% Triton X-100. The scale bar is 100 nm.
